# Supplementary material for: Multiple endocrine neoplasia type 4: a new member of the MEN family
Source: PubMed Central journal article supplement — Endocr Connect. 2023 Jan 24;12(2):e220411. doi: 10.1530/EC-22-0411 (PMC9874964; doi:10.1530/ec-22-0411), 2023-01-24
Supplement: supplementary_table_1.pdf [file supplementary_table_1.pdf]

**Table S1**Search syntax

---

Database: MEDLINE® (www.PubMed.gov), Web of Science™

|         |                   |          |
|---------|-------------------|----------|
| Search: | “MEN4”            | 182 hits |
|         | “MENX”            | 136 hits |
|         | “MEN4 and CDKN1B” | 63 hits  |
|         | “MENX and CDKN1B” | 54 hits  |
|         | Total             | 435 hits |

Search period: 1 January 2006 to 31 August 2022

Last search update: 1 September 2022
