# Supplementary material for: Multiple endocrine neoplasia type 4: a new member of the MEN family
Source: PubMed Central journal article supplement — Endocr Connect. 2023 Jan 24;12(2):e220411. doi: 10.1530/EC-22-0411 (PMC9874964; doi:10.1530/ec-22-0411), 2023-01-24
Supplement: supplementary_table_2.pdf [file supplementary_table_2.pdf]

## Table S2

### Inclusion and exclusion criteria (screening and eligibility)

---

- Inclusion criteria:
- MENX with CDKN1B mutation
  - MEN4 with CDKN1B mutation
  - Human study
  - All ages
  - All types of articles (original article, case series, case report, review article with case report, letter to the editor)
  - Publication in English, French, German, Italian, Spanish
  - Detailed case description of symptomatic patients.
- Data on the following three categories must be available:
- Gender (male/female)
  - Affected endocrine organs
  - Mutation (genotype)

- Exclusion criteria:
- Publication not related to MEN4 or MENX
  - Cell culture
  - Animal model
  - Review article
  - Publication in languages other than English, French, German, Italian, Spanish
  - Insufficient case description of symptomatic patients.
- No data on at least one of the following categories:
- Gender (male/female)
  - Affected endocrine organs
  - Mutation (genotype)
