# Supplementary material for: Multiple endocrine neoplasia type 4: a new member of the MEN family
Source: PubMed Central journal article supplement — Endocr Connect. 2023 Jan 24;12(2):e220411. doi: 10.1530/EC-22-0411 (PMC9874964; doi:10.1530/ec-22-0411), 2023-01-24
Supplement: supplementary_table_3.pdf [file supplementary_table_3.pdf]

**Table S3**

## Characteristics of included studies

---

| Study                   | Country                     | Year <sup>1</sup> | Study <sup>2</sup> | Study description                                                         | Symptomatic patients (n) |
|-------------------------|-----------------------------|-------------------|--------------------|---------------------------------------------------------------------------|--------------------------|
| Pellegata et al. [1]    | Germany                     | 2006              | OA                 | Case report, genetic analysis in rats and one patient                     | 1                        |
| Georgitsi et al. [20]   | Finland, multiple countries | 2007              | OA                 | Retrospective analysis of 37 suspected MEN1 and 69 acromegaly patients    | 1                        |
| Agarwal et al. [26]     | USA                         | 2009              | OA                 | Retrospective analysis of 196 suspected MEN1 patients                     | 4                        |
| Molatore et al [21]     | Germany, Italy              | 2010              | OA                 | Retrospective analysis of 27 suspected MEN1 patients                      | 1                        |
| Costa-Guda et al [36]   | USA, Germany                | 2011              | OA                 | Retrospective analysis of 86 patients with sporadic parathyroid adenomas  | 2                        |
| Belar et al. [15]       | Spain                       | 2012              | OA                 | Retrospective analysis of 79 suspected MEN1 patients                      | 1                        |
| Tichomorowa et al. [37] | Belgium, multiple countries | 2012              | OA                 | Retrospective analysis of 124 <i>AIP</i> mutation-negative FIPA patients  | 2                        |
| Malanga et al. [33]     | Italy, Spain                | 2012              | OA                 | Retrospective analysis of 15 suspected MEN1 patients                      | 1                        |
| Occhi et al. [22]       | Italy, UK, Germany          | 2013              | OA                 | Case report, genetic analysis                                             | 1                        |
| Tonelli et al. [18]     | Italy                       | 2014              | CR                 | Case report, short review                                                 | 1                        |
| Elston et al. [38]      | New Zealand                 | 2015              | CR                 | Case report                                                               | 1                        |
| Samburgaro et al. [41]  | Italy, Germany              | 2015              | CR                 | Case report, genetic analysis                                             | 1                        |
| Bugalho et al. [39]     | Portugal                    | 2016              | CR                 | Case report                                                               | 1                        |
| Borsari et al. [42]     | Italy, Germany              | 2017              | OA                 | Retrospective analysis of 147 patients with sporadic parathyroid adenomas | 3                        |
| Frederiksen et al. [34] | Denmark, UK                 | 2019              | OA                 | Case series, short review                                                 | 13                       |
| Brock et al. [35]       | USA                         | 2020              | CR                 | Case report                                                               | 1                        |
| Chasseloup et al. [40]  | USA, multiple countries     | 2020              | OA                 | Retrospective analysis of 211 pediatric patients with Cushing's disease   | 5                        |
| Chevalier et al. [45]   | France                      | 2020              | L                  | Case report                                                               | 2                        |
| Lavezzi et al. [43]     | Italy                       | 2022              | CR                 | Case report, short review                                                 | 2                        |
| Seabrook et al. [44]    | Australia                   | 2022              | CR                 | Case report                                                               | 3                        |

|                    |                                                    |
|--------------------|----------------------------------------------------|
| Year <sup>1</sup>  | year of publication                                |
| Study <sup>2</sup> | type of study                                      |
| OA                 | original article                                   |
| CR                 | case report                                        |
| L                  | letter to the editor                               |
| <i>AIP</i>         | aryl hydrocarbon receptor interacting protein gene |
| FIPA               | familial isolated pituitary adenoma                |
